# Supplementary material
Source: publisher figshare collection journal article supplement (https://sage.figshare.com/ndownloader/files/13158545)
Supplement: Supplementary file 1 [file 13158545]

Supplemental Appendix A1

Probit Model: propensity score calculation for PSM analysis

| Terminated                   | 1-year<br>( <i>n</i> =807) | 2-year<br>( <i>n</i> =802) | 3-year<br>( <i>n</i> =710) |
|------------------------------|----------------------------|----------------------------|----------------------------|
| Graduated (reference)        | β                          | β                          | β                          |
| Offender Age                 | -.0059694<br>(.0053893)    | -.0060212<br>(.0053922)    | -.0068119<br>(.0056891)    |
| Female                       | -.0150741<br>(.101884)     | -.01255<br>(.1019255)      | .0311731<br>(.1076739)     |
| Nonwhite                     | .2328114*<br>(.1068413)    | .2252173*<br>(.1070673)    | .2092489<br>(.1117045)     |
| Hazardous Drug (DOC)         | .138213<br>(.1002315)      | .139811<br>(.100277)       | .1216642<br>(.1060419)     |
| Possession Conviction        | .2812386*<br>(.0988485)    | .2880816*<br>(.0990233)    | .2870309*<br>(.1048197)    |
| Misdemeanor Crim.<br>History | .031869<br>(.0198105)      | .0327363<br>(.0198365)     | .0288992<br>(.020941)      |
| Felony Criminal History      | .0289993<br>(.1093954)     | .0335759<br>(.1093842)     | .0884056<br>(.1176919)     |
| No Diploma (Education)       | .6734631**<br>(.1124116)   | .6512167**<br>(.1132605)   | .6765142**<br>(.1192374)   |
| Positive Drug Screens        | -.0513583<br>(.0326617)    | -.0501525<br>(.0329429)    | -.0482134<br>(.034675)     |
| Total Violations             | .0482679**<br>(.0121201)   | .0463562**<br>(.0122997)   | .0477547**<br>(.013043)    |
| Constant                     | -.8525447**<br>(.1911719)  | -.8473602**<br>(.1913945)  | -.7844714**<br>(.202137)   |

*Note. Standard errors are in parentheses.*

\**p* < .05. \*\**p* < .001

## Supplemental Appendix A2

## Multinomial Probit Model: 1-year follow-up propensity score calculation

| Case Outcome                 | Prison                   | Jail                     | Probation                |
|------------------------------|--------------------------|--------------------------|--------------------------|
| Dismissed (reference)        |                          |                          |                          |
| <i>n</i> = 807               | $\beta$                  | $\beta$                  | $\beta$                  |
| Offender Age                 | -.2676426*<br>(.1054881) | .0352324<br>(.117476)    | -.0935756<br>(.1120738)  |
| Female                       | -.147527<br>(.1647152)   | -.1237833<br>(.1900085)  | .2472853<br>(.1796608)   |
| Nonwhite                     | .3422785*<br>(.1670896)  | .1711202<br>(.2090108)   | .2395401<br>(.1909069)   |
| Hazardous Drug (DOC)         | .2956343<br>(.1607351)   | .0240656<br>(.1901383)   | .1440795<br>(.1801434)   |
| Possession Conviction        | .1065128<br>(.1547065)   | 1.371538**<br>(.242117)  | .114018<br>(.1769721)    |
| Misdemeanor Crim.<br>History | .2402326*<br>(.086603)   | .0823607<br>(.1065325)   | .0155904<br>(.100346)    |
| Felony Criminal History      | .3600307<br>(.195625)    | -.0538249<br>(.2455699)  | -.155904<br>(.2562936)   |
| No Diploma (Education)       | .920124**<br>(.1700089)  | .8805342**<br>(.2042024) | .6550174**<br>(.1995055) |
| Positive Drug Screens        | .0498284<br>(.115107)    | -.2085441<br>(.1391879)  | .043529<br>(.1300693)    |
| Total Violations             | .239254*<br>(.0916222)   | .1754307<br>(.1078659)   | .128783<br>(.1029974)    |
| Constant                     | -.9190191<br>(.5933446)  | -3.116086**<br>(.70486)  | -1.649721*<br>(.6501643) |

*Note. Standard errors are in parentheses.*

\**p* < .05. \*\**p* < .001

Supplemental Appendix A3

Multinomial Probit Model: 2-year follow-up propensity score calculation

| Case Outcome                 | Prison                   | Jail                      | Probation                |
|------------------------------|--------------------------|---------------------------|--------------------------|
| Dismissed (reference)        |                          |                           |                          |
| <i>n</i> = 802               | $\beta$                  | $\beta$                   | $\beta$                  |
| Offender Age                 | -.2682697*<br>(.105622)  | .031344<br>(.1176238)     | -.0938995<br>(.1121083)  |
| Female                       | -.133476<br>(.1648045)   | -.1429986<br>(.1909113)   | .2482401<br>(.179778)    |
| Nonwhite                     | .3228493<br>(.1678082)   | .1692004<br>(.2092197)    | .2382459<br>(.1910781)   |
| Hazardous Drug (DOC)         | .3002096<br>(.1609376)   | .0179452<br>(.1904089)    | .1445118<br>(.1801572)   |
| Possession Conviction        | .1259118<br>(.1553457)   | 1.364393**<br>(.2422009)  | .1144683<br>(.1770888)   |
| Misdemeanor Crim.<br>History | .2433251*<br>(.0869655)  | .093707<br>(.1068274)     | .0156564<br>(.1004886)   |
| Felony Criminal History      | .3731555<br>(.1955784)   | -.0477804<br>(.2456418)   | -.1602208<br>(.2563748)  |
| No Diploma (Education)       | .8717205**<br>(.1720799) | .8425929**<br>(.2061568)  | .6554741**<br>(.2003925) |
| Positive Drug Screens        | .05586<br>(.1162841)     | -.1839559<br>(.1406282)   | .0428738<br>(.1307354)   |
| Total Violations             | .2235293*<br>(.0930944)  | .1423178<br>(.1104936)    | .1315845<br>(.1042383)   |
| Constant                     | -.9022133<br>(.594398)   | -3.039231**<br>(.7052059) | -1.654603*<br>(.6508296) |

*Note. Standard errors are in parentheses.*

\**p* < .05. \*\**p* < .001

Supplemental Appendix A4

Multinomial Probit Model: 3-year follow-up propensity score calculation

| Case Outcome                 | Prison                   | Jail                     | Probation                |
|------------------------------|--------------------------|--------------------------|--------------------------|
| Dismissed (reference)        |                          |                          |                          |
| <i>n</i> = 710               | $\beta$                  | $\beta$                  | $\beta$                  |
| Offender Age                 | -.232202*<br>(.1098447)  | -.0110486<br>(.1237045)  | -.1012517<br>(.116084)   |
| Female                       | -.1151398<br>(.1747934)  | -.0636515<br>(.1992276)  | .3243627<br>(.1872369)   |
| Nonwhite                     | .3352909<br>(.1753662)   | .0937293<br>(.2173564)   | .2377925<br>(.1968827)   |
| Hazardous Drug (DOC)         | .3120589<br>(.1704627)   | -.0517034<br>(.1990412)  | .0991219<br>(.1878882)   |
| Possession Conviction        | .0529542<br>(.1646421)   | 1.377517**<br>(.2495031) | .1643771<br>(.1863297)   |
| Misdemeanor Crim.<br>History | .2153541*<br>(.0915637)  | .1100368<br>(.1120509)   | -.0146657<br>(.1043971)  |
| Felony Criminal History      | .5153663*<br>(.2080793)  | -.1134218<br>(.2764058)  | -.0519582<br>(.2696198)  |
| No Diploma (Education)       | .9350053**<br>(.1806834) | .8339085**<br>(.2152306) | .6823407**<br>(.2078431) |
| Positive Drug Screens        | .0498661<br>(.1241604)   | -.2288147<br>(.1492169)  | .0518676<br>(.1381491)   |
| Total Violations             | .2085858*<br>(.0991588)  | .1936306<br>(.1162807)   | .163778<br>(.1093448)    |
| Constant                     | -.9874845<br>(.6204359)  | -2.77371**<br>(.7336252) | -1.637781*<br>(.6769485) |

*Note. Standard errors are in parentheses.*

\**p* < .05. \*\**p* < .001

Supplemental Appendix B1  
Comparison between Unmatched v. Matched Samples

| Successful v. Terminated (1-year recidivism) |                             |         |        |                           |         |        |                  |
|----------------------------------------------|-----------------------------|---------|--------|---------------------------|---------|--------|------------------|
| Terminated (treatment)                       | Unmatched Samples (n = 807) |         |        | Matched Samples (n = 544) |         |        | % reduction bias |
|                                              | Mean                        |         | t-stat | Mean                      |         | t-stat |                  |
|                                              | Treated                     | Control |        | Treated                   | Control |        |                  |
| Age                                          | 30.116                      | 31.204  | -1.60  | 30.601                    | 30.082  | .61    | 52.4             |
| Female                                       | .33119                      | .33065  | .02    | .3346                     | .30928  | .57    | -4550.2          |
| Nonwhite                                     | .36977                      | .26815  | 3.06*  | .31559                    | .32474  | -.21   | 91.0             |
| Hazardous Drug                               | .52733                      | .48387  | 1.20   | .53232                    | .58763  | -1.18  | -27.3            |
| Possession Charge                            | .66559                      | .54839  | 3.32** | .63878                    | .71649  | -1.75  | 33.7             |
| No Diploma                                   | .34727                      | .13911  | 7.16** | .26236                    | .34536  | -1.75  | 60.1             |
| Mis. Criminal History                        | 2.3762                      | 1.9899  | 2.18*  | 2.2852                    | 2.366   | -.33   | 79.1             |
| Fel. Criminal History                        | .17363                      | .14315  | .97    | .14829                    | .20103  | -1.19  | -73.0            |
| Positive Drug Screens                        | 1.7203                      | 1.631   | .71    | 1.7452                    | 1.768   | -.15   | -74.4            |
| Total Violations                             | 6.8199                      | 5.4315  | 4.12** | 6.1749                    | 6.7268  | -1.26  | 60.3             |
| Successful v. Terminated (2-year recidivism) |                             |         |        |                           |         |        |                  |
|                                              | Unmatched Samples (n = 802) |         |        | Matched Samples (n = 547) |         |        |                  |
|                                              |                             |         |        |                           |         |        |                  |
| Age                                          | 30.203                      | 31.204  | -1.46  | 30.852                    | 30.031  | .93    | 18.0             |
| Female                                       | .33333                      | .33065  | .08    | .33333                    | .33161  | .04    | 35.8             |
| Nonwhite                                     | .36601                      | .26815  | 2.93*  | .31439                    | .34197  | -.62   | 71.8             |
| Hazardous Drug                               | .52941                      | .48387  | 1.25   | .54167                    | .56477  | -.49   | 49.3             |
| Possession Charge                            | .66993                      | .54839  | 3.43** | .65152                    | .69948  | -1.08  | 60.5             |
| No Diploma                                   | .3366                       | .13911  | 6.80** | .25379                    | .33679  | -1.94  | 58.0             |
| Mis. Criminal History                        | 2.3922                      | 1.9899  | 2.25*  | 2.2917                    | 2.4352  | -.57   | 64.3             |
| Fel. Criminal History                        | .17647                      | .14315  | 1.05   | .15152                    | .17098  | -.45   | 41.6             |
| Positive Drug Screens                        | 1.7124                      | 1.631   | .65    | 1.7462                    | 1.8497  | -.64   | -27.2            |
| Total Violations                             | 6.6732                      | 5.4315  | 3.72** | 6.197                     | 6.9119  | -1.65  | 42.4             |
| Successful v. Terminated (3-year recidivism) |                             |         |        |                           |         |        |                  |
|                                              | Unmatched Samples (n = 710) |         |        | Matched Samples (n = 585) |         |        |                  |
|                                              |                             |         |        |                           |         |        |                  |
| Age                                          | 30.269                      | 31.366  | -1.52  | 30.626                    | 30.764  | -.15   | 87.3             |
| Female                                       | .34266                      | .32783  | .41    | .34894                    | .36207  | -.27   | 11.4             |
| Nonwhite                                     | .37762                      | .28066  | 2.73*  | .33191                    | .37356  | -.87   | 57.0             |
| Hazardous Drug                               | .53147                      | .48585  | 1.19   | .5234                     | .55172  | -.57   | 37.9             |
| Possession Charge                            | .66084                      | .53538  | 3.35** | .63404                    | .70115  | -1.42  | 46.5             |
| No Diploma                                   | .35315                      | .14151  | 6.81** | .25532                    | .33908  | -1.85  | 60.4             |
| Mis. Criminal History                        | 2.4231                      | 2.0448  | 1.98*  | 2.2085                    | 2.4253  | -.88   | 42.7             |
| Fel. Criminal History                        | .17832                      | .125    | 1.62   | .14043                    | .18391  | -1.02  | 18.5             |
| Positive Drug Screens                        | 1.7483                      | 1.6698  | .59    | 1.8255                    | 2.023   | -1.10  | -151.7           |
| Total Violations                             | 6.549                       | 5.316   | 3.51** | 6.1489                    | 6.6954  | -1.17  | 55.7             |

Note. Asterisk denotes significant difference between means at  $p < .05$

Supplemental Appendix B2  
Comparison between Unweighted v. Weighted Samples (1-yr. window)

| <i>n</i> = 807               | Unweighted |        |        |        | Weighted |        |       |        |
|------------------------------|------------|--------|--------|--------|----------|--------|-------|--------|
|                              | Dismiss    | Probat | Jail   | Prison | Dismiss  | Probat | Jail  | Prison |
| Age                          |            |        |        |        |          |        |       |        |
| Dismissed                    | ---        | ---    | ---    | ---    | ---      | ---    | ---   | ---    |
| Probation                    | -1.02      | ---    | ---    | ---    | .01      | ---    | ---   | ---    |
| Jail                         | .48        | 1.14   | ---    | ---    | .12      | .09    | ---   | ---    |
| Prison                       | -2.33*     | -.64   | -1.95  | ---    | -.61     | -.39   | -.42  | ---    |
| Female                       |            |        |        |        |          |        |       |        |
| Dismissed                    | ---        | ---    | ---    | ---    | ---      | ---    | ---   | ---    |
| Probation                    | 1.59       | ---    | ---    | ---    | -.01     | ---    | ---   | ---    |
| Jail                         | .20        | -1.03  | ---    | ---    | -.03     | -.02   | ---   | ---    |
| Prison                       | -1.18      | -2.18* | -.96   | ---    | -.08     | -.11   | -.06  | ---    |
| Nonwhite                     |            |        |        |        |          |        |       |        |
| Dismissed                    | ---        | ---    | ---    | ---    | ---      | ---    | ---   | ---    |
| Probation                    | 1.19       | ---    | ---    | ---    | -.37     | ---    | ---   | ---    |
| Jail                         | 1.10       | -.06   | ---    | ---    | -1.92    | -1.36  | ---   | ---    |
| Prison                       | 3.29*      | 1.10   | -1.16  | ---    | .09      | .38    | 1.81  | ---    |
| Hazardous Drug               |            |        |        |        |          |        |       |        |
| Dismissed                    | ---        | ---    | ---    | ---    | ---      | ---    | ---   | ---    |
| Probation                    | .69        | ---    | ---    | ---    | .08      | ---    | ---   | ---    |
| Jail                         | .90        | .17    | ---    | ---    | 1.16     | .97    | ---   | ---    |
| Prison                       | .84        | .05    | -.25   | ---    | -.10     | -.13   | -1.12 | ---    |
| Possession Charge            |            |        |        |        |          |        |       |        |
| Dismissed                    | ---        | ---    | ---    | ---    | ---      | ---    | ---   | ---    |
| Probation                    | .68        | ---    | ---    | ---    | .19      | ---    | ---   | ---    |
| Jail                         | 5.20*      | 4.33*  | ---    | ---    | -.16     | -.24   | ---   | ---    |
| Prison                       | .69        | -.15   | -4.69* | ---    | .24      | .00    | .25   | ---    |
| No Diploma                   |            |        |        |        |          |        |       |        |
| Dismissed                    | ---        | ---    | ---    | ---    | ---      | ---    | ---   | ---    |
| Probation                    | 3.14*      | ---    | ---    | ---    | -.21     | ---    | ---   | ---    |
| Jail                         | 4.50*      | .97    | ---    | ---    | -.37     | -.18   | ---   | ---    |
| Prison                       | 6.27*      | 1.42   | .30    | ---    | .10      | .26    | .40   | ---    |
| Misdemeanor Criminal History |            |        |        |        |          |        |       |        |
| Dismissed                    | ---        | ---    | ---    | ---    | ---      | ---    | ---   | ---    |
| Probation                    | -.24       | ---    | ---    | ---    | .21      | ---    | ---   | ---    |
| Jail                         | 1.28       | 1.16   | ---    | ---    | -1.08    | -1.10  | ---   | ---    |
| Prison                       | 3.17*      | 2.31   | .94    | ---    | -.18     | -.31   | .91   | ---    |
| Felony Criminal History      |            |        |        |        |          |        |       |        |
| Dismissed                    | ---        | ---    | ---    | ---    | ---      | ---    | ---   | ---    |
| Probation                    | -.55       | ---    | ---    | ---    | -.56     | ---    | ---   | ---    |
| Jail                         | .31        | .65    | ---    | ---    | -.90     | .813   | ---   | ---    |
| Prison                       | 2.31*      | 2.01*  | 1.24   | ---    | -.01     | .615   | .81   | ---    |
| Positive Drug Screens        |            |        |        |        |          |        |       |        |
| Dismissed                    | ---        | ---    | ---    | ---    | ---      | ---    | ---   | ---    |
| Probation                    | 1.32       | ---    | ---    | ---    | .25      | ---    | ---   | ---    |
| Jail                         | -.53       | -1.41  | ---    | ---    | -.61     | -.67   | ---   | ---    |
| Prison                       | 2.63*      | .58    | 2.19*  | ---    | .03      | -.19   | .58   | ---    |
| Total Violations             |            |        |        |        |          |        |       |        |
| Dismissed                    | ---        | ---    | ---    | ---    | ---      | ---    | ---   | ---    |
| Probation                    | 1.71       | ---    | ---    | ---    | .11      | ---    | ---   | ---    |
| Jail                         | .91        | -.60   | ---    | ---    | -.76     | -.71   | ---   | ---    |
| Prison                       | 3.90*      | 1.07   | 1.75   | ---    | -.05     | -.13   | .64   | ---    |

Supplemental Appendix B3  
Comparison between Unweighted v. Weighted Samples (2-yr. window)

| <i>n</i> = 802               | Unweighted |        |        |        | Weighted |        |       |        |
|------------------------------|------------|--------|--------|--------|----------|--------|-------|--------|
|                              | Dismiss    | Probat | Jail   | Prison | Dismiss  | Probat | Jail  | Prison |
| Age                          |            |        |        |        |          |        |       |        |
| Dismissed                    | ---        | ---    | ---    | ---    | ---      | ---    | ---   | ---    |
| Probation                    | -1.02      | ---    | ---    | ---    | .02      | ---    | ---   | ---    |
| Jail                         | .55        | 1.19   | ---    | ---    | .11      | .07    | ---   | ---    |
| Prison                       | -2.16*     | -.54   | -1.91* | ---    | -.62     | -.40   | -.42  | ---    |
| Female                       |            |        |        |        |          |        |       |        |
| Dismissed                    | ---        | ---    | ---    | ---    | ---      | ---    | ---   | ---    |
| Probation                    | 1.59       | ---    | ---    | ---    | .00      | ---    | ---   | ---    |
| Jail                         | .05        | -1.14  | ---    | ---    | .01      | .01    | ---   | ---    |
| Prison                       | -1.00      | -2.05* | -.71   | ---    | -.20     | -.15   | -.12  | ---    |
| Nonwhite                     |            |        |        |        |          |        |       |        |
| Dismissed                    | ---        | ---    | ---    | ---    | ---      | ---    | ---   | ---    |
| Probation                    | 1.19       | ---    | ---    | ---    | -.38     | ---    | ---   | ---    |
| Jail                         | 1.17       | .00    | ---    | ---    | -1.90    | -1.33  | ---   | ---    |
| Prison                       | 3.06*      | .97    | .96    | ---    | .16      | .44    | 1.83  | ---    |
| Hazardous Drug               |            |        |        |        |          |        |       |        |
| Dismissed                    | ---        | ---    | ---    | ---    | ---      | ---    | ---   | ---    |
| Probation                    | .69        | ---    | ---    | ---    | .08      | ---    | ---   | ---    |
| Jail                         | .80        | .10    | ---    | ---    | 1.16     | .97    | ---   | ---    |
| Prison                       | .98        | .05    | -.06   | ---    | -.13     | -.16   | -1.14 | ---    |
| Possession Charge            |            |        |        |        |          |        |       |        |
| Dismissed                    | ---        | ---    | ---    | ---    | ---      | ---    | ---   | ---    |
| Probation                    | .68        | ---    | ---    | ---    | .24      | ---    | ---   | ---    |
| Jail                         | 5.17*      | 4.30*  | ---    | ---    | -.13     | -.23   | ---   | ---    |
| Prison                       | .87        | -.02   | -4.57* | ---    | .21      | -.06   | .21   | ---    |
| No Diploma                   |            |        |        |        |          |        |       |        |
| Dismissed                    | ---        | ---    | ---    | ---    | ---      | ---    | ---   | ---    |
| Probation                    | 3.14*      | ---    | ---    | ---    | -.22     | ---    | ---   | ---    |
| Jail                         | 4.32*      | .86    | ---    | ---    | -.36     | -.17   | ---   | ---    |
| Prison                       | 5.85*      | 1.18   | .19    | ---    | .15      | .31    | .43   | ---    |
| Misdemeanor Criminal History |            |        |        |        |          |        |       |        |
| Dismissed                    | ---        | ---    | ---    | ---    | ---      | ---    | ---   | ---    |
| Probation                    | -.24       | ---    | ---    | ---    | .27      | ---    | ---   | ---    |
| Jail                         | 1.43       | 1.28   | ---    | ---    | -1.06    | -1.11  | ---   | ---    |
| Prison                       | 3.22*      | 2.35*  | .86    | ---    | -.15     | -.33   | .90   | ---    |
| Felony Criminal History      |            |        |        |        |          |        |       |        |
| Dismissed                    | ---        | ---    | ---    | ---    | ---      | ---    | ---   | ---    |
| Probation                    | -.55       | ---    | ---    | ---    | -.53     | ---    | ---   | ---    |
| Jail                         | .35        | .68    | ---    | ---    | -.93     | -.27   | ---   | ---    |
| Prison                       | 2.44*      | 2.10*  | 1.29   | ---    | -.03     | .47    | .82   | ---    |
| Positive Drug Screens        |            |        |        |        |          |        |       |        |
| Dismissed                    | ---        | ---    | ---    | ---    | ---      | ---    | ---   | ---    |
| Probation                    | 1.32       | ---    | ---    | ---    | .27      | ---    | ---   | ---    |
| Jail                         | -.54       | -1.41  | ---    | ---    | -.59     | -.67   | ---   | ---    |
| Prison                       | 2.53*      | .53    | 2.14*  | ---    | .07      | -.18   | .58   | ---    |
| Total Violations             |            |        |        |        |          |        |       |        |
| Dismissed                    | ---        | ---    | ---    | ---    | ---      | ---    | ---   | ---    |
| Probation                    | 1.72       | ---    | ---    | ---    | .06      | ---    | ---   | ---    |
| Jail                         | .57        | -.86   | ---    | ---    | -.63     | -.56   | ---   | ---    |
| Prison                       | 3.58*      | .87    | 1.84   | ---    | -.01     | -.06   | .54   | ---    |

Note. All statistics are reported in t-stats and z-scores. Asterisk denotes significant difference between means at  $p < .05$ .

Supplemental Appendix B4  
Comparison between Unweighted v. Weighted Samples (3-yr. window)

| <i>n</i> = 710               | Unweighted |        |        |        | Weighted |        |       |        |
|------------------------------|------------|--------|--------|--------|----------|--------|-------|--------|
|                              | Dismiss    | Probat | Jail   | Prison | Dismiss  | Probat | Jail  | Prison |
| Age                          |            |        |        |        |          |        |       |        |
| Dismissed                    | ---        | ---    | ---    | ---    | ---      | ---    | ---   | ---    |
| Probation                    | -1.09      | ---    | ---    | ---    | .892     | ---    | ---   | ---    |
| Jail                         | .09        | .89    | ---    | ---    | .709     | .21    | ---   | ---    |
| Prison                       | -1.85      | -.30   | -1.31  | ---    | .657     | -.40   | -.58  | ---    |
| Female                       |            |        |        |        |          |        |       |        |
| Dismissed                    | ---        | ---    | ---    | ---    | ---      | ---    | ---   | ---    |
| Probation                    | 1.87       | ---    | ---    | ---    | -.08     | ---    | ---   | ---    |
| Jail                         | .40        | -1.08  | ---    | ---    | -.31     | -.23   | ---   | ---    |
| Prison                       | -.93       | -2.26  | -.99   | ---    | -.22     | -.10   | .16   | ---    |
| Nonwhite                     |            |        |        |        |          |        |       |        |
| Dismissed                    | ---        | ---    | ---    | ---    | ---      | ---    | ---   | ---    |
| Probation                    | 1.16       | ---    | ---    | ---    | -.26     | ---    | ---   | ---    |
| Jail                         | .99        | -.11   | ---    | ---    | -1.83    | -1.37  | ---   | ---    |
| Prison                       | 2.93*      | .97    | 1.07   | ---    | .19      | .36    | 1.79  | ---    |
| Hazardous Drug               |            |        |        |        |          |        |       |        |
| Dismissed                    | ---        | ---    | ---    | ---    | ---      | ---    | ---   | ---    |
| Probation                    | .55        | ---    | ---    | ---    | .01      | ---    | ---   | ---    |
| Jail                         | .55        | .01    | ---    | ---    | 1.38     | 1.19   | ---   | ---    |
| Prison                       | 1.17       | .32    | .30    | ---    | -.35     | -.25   | -1.45 | ---    |
| Possession Charge            |            |        |        |        |          |        |       |        |
| Dismissed                    | ---        | ---    | ---    | ---    | ---      | ---    | ---   | ---    |
| Probation                    | 1.03       | ---    | ---    | ---    | .40      | ---    | ---   | ---    |
| Jail                         | 5.12*      | 4.06*  | ---    | ---    | -.22     | -.39   | ---   | ---    |
| Prison                       | .60        | -.51   | -4.62* | ---    | .16      | -.23   | .27   | ---    |
| No Diploma                   |            |        |        |        |          |        |       |        |
| Dismissed                    | ---        | ---    | ---    | ---    | ---      | ---    | ---   | ---    |
| Probation                    | 3.19*      | ---    | ---    | ---    | -.22     | ---    | ---   | ---    |
| Jail                         | 4.19*      | .76    | ---    | ---    | -.31     | -.14   | ---   | ---    |
| Prison                       | 6.01*      | 1.35   | .48    | ---    | .06      | .24    | .33   | ---    |
| Misdemeanor Criminal History |            |        |        |        |          |        |       |        |
| Dismissed                    | ---        | ---    | ---    | ---    | ---      | ---    | ---   | ---    |
| Probation                    | -.53       | ---    | ---    | ---    | .24      | ---    | ---   | ---    |
| Jail                         | 1.45       | 1.52   | ---    | ---    | -1.19    | -1.22  | ---   | ---    |
| Prison                       | 2.97*      | 2.48*  | .71    | ---    | -.11     | -.28   | 1.05  | ---    |
| Felony Criminal History      |            |        |        |        |          |        |       |        |
| Dismissed                    | ---        | ---    | ---    | ---    | ---      | ---    | ---   | ---    |
| Probation                    | -.08       | ---    | ---    | ---    | -.57     | ---    | ---   | ---    |
| Jail                         | -.03       | .04    | ---    | ---    | -.88     | -.27   | ---   | ---    |
| Prison                       | 3.43*      | 2.41*  | 2.57*  | ---    | .10      | .61    | .90   | ---    |
| Positive Drug Screens        |            |        |        |        |          |        |       |        |
| Dismissed                    | ---        | ---    | ---    | ---    | ---      | ---    | ---   | ---    |
| Probation                    | 1.50       | ---    | ---    | ---    | .24      | ---    | ---   | ---    |
| Jail                         | -.53       | -1.54  | ---    | ---    | -.37     | -.47   | ---   | ---    |
| Prison                       | 2.12*      | .13    | 1.88   | ---    | -.14     | -.31   | .26   | ---    |
| Total Violations             |            |        |        |        |          |        |       |        |
| Dismissed                    | ---        | ---    | ---    | ---    | ---      | ---    | ---   | ---    |
| Probation                    | 2.02*      | ---    | ---    | ---    | .06      | ---    | ---   | ---    |
| Jail                         | .83        | -.89   | ---    | ---    | -.77     | -.69   | ---   | ---    |
| Prison                       | 3.00*      | .28    | 1.28   | ---    | -.14     | -.15   | .61   | ---    |

Note. All statistics are reported in t-stats and z-scores. Asterisk denotes significant difference between means at  $p < .05$ .
